# Supplementary material for: Spatiotemporal Variation in Rainfall Erosivity and Correlation with the ENSO on the Tibetan Plateau since 1971
Source: MDPI journal article supplement (doi:10.3390/ijerph182111054), 2021-10-21
Supplement: s1 [file s1]

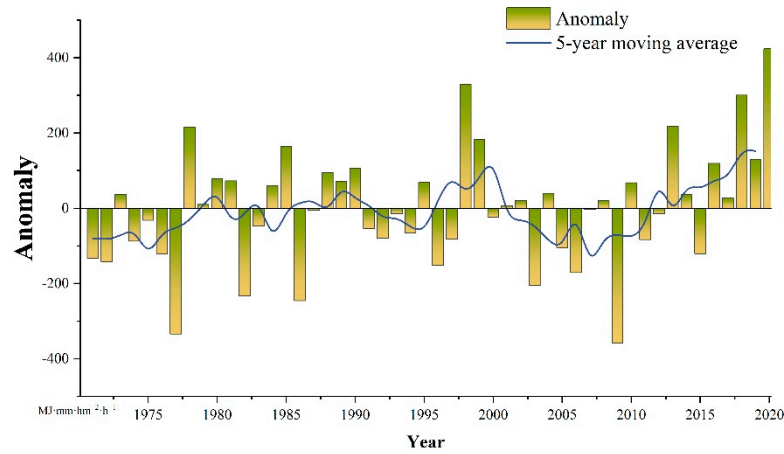

**Figure S1.** Rainfall erosivity anomalies from 1971 to 2017, the blue line shows the 5-year moving average curve.

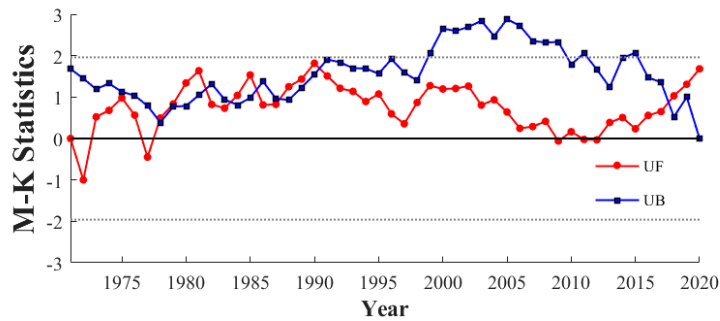

**Figure S2.** Sequential MK test for 50-year rainfall erosivity of TP. Note: UF and UB refer to progressive and retrograde sequences within the sequence, respectively. UF > 0 indicates an increasing trend, UF < 0 indicates a decreasing trend. The mutation year exists at the intersection of UF and UB. The dashed line represents the 95% confidence interval.

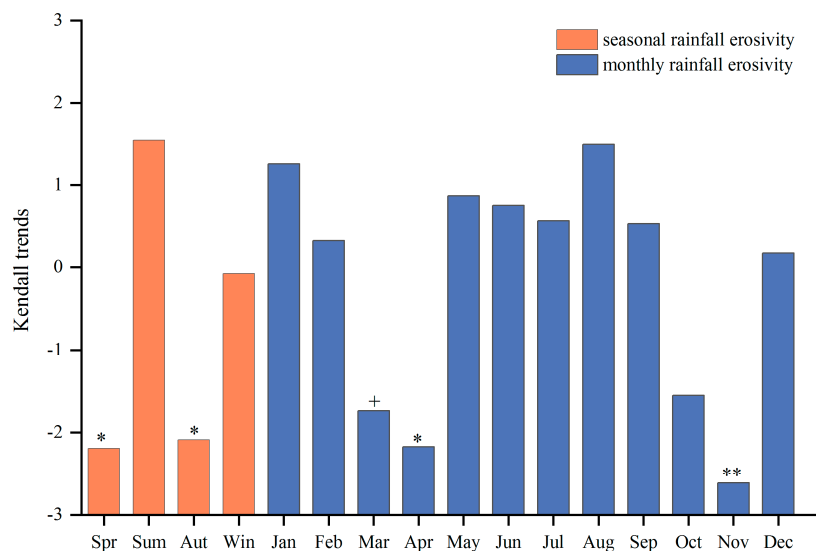

**Figure S3.** Seasonal and monthly average rainfall erosivity Mann-Kendall trends of plateau from 1971 to 2020. \*\*  $p < 0.01$ ; \*  $p < 0.05$ ; +  $p < 0.1$ .

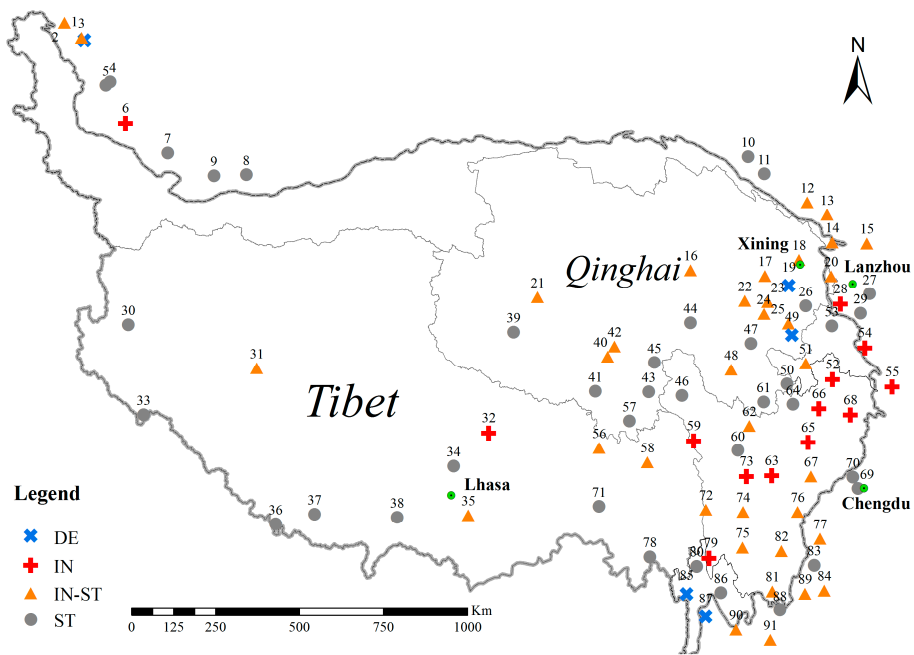

**Figure S4.** Long-term trend pattern of rainfall erosivity at each station from 1971 to 2020. Note: DE: decreasing, ST: stagnating, IN-ST: increasing-stagnating, IN: increasing.

**Table S1.** The basic information of 91 meteorological stations in this study. ‘No’ refers to station number, which is the same as the station number in Figure 1.

| No. | Station    | Province | Latitude (°N) | Longitude (°E) | Altitude (m) | No. | Station    | Province | Latitude (°N) | Longitude (°E) | Altitude (m) |
|-----|------------|----------|---------------|----------------|--------------|-----|------------|----------|---------------|----------------|--------------|
| 1   | Artux      | Xinjiang | 39.4          | 76.1           | 1298.7       | 47  | Golog      | Qinghai  | 34.5          | 100.3          | 3719         |
| 2   | Wuqia      | Xinjiang | 39.7          | 75.3           | 2175.7       | 48  | Darlag     | Qinghai  | 33.8          | 99.7           | 3967.5       |
| 3   | Kashgar    | Xinjiang | 39.5          | 76.0           | 1289.4       | 49  | Henan      | Qinghai  | 34.7          | 101.6          | 3500         |
| 4   | Makit      | Xinjiang | 38.5          | 77.4           | 1178.2       | 50  | Jigzhi     | Qinghai  | 33.4          | 101.5          | 3628.5       |
| 5   | Yarkant    | Xinjiang | 38.4          | 77.3           | 1231.2       | 51  | Maqu       | Gansu    | 34.0          | 102.1          | 3471.4       |
| 6   | Pishan     | Xinjiang | 37.6          | 78.3           | 1375.4       | 52  | Zoige      | Sichuan  | 33.6          | 103.0          | 3439.6       |
| 7   | Hotan      | Xinjiang | 37.1          | 79.9           | 1375         | 53  | Hezuo      | Gansu    | 35.0          | 102.9          | 2910         |
| 8   | Minfeng    | Xinjiang | 37.1          | 82.7           | 1409.5       | 54  | Min        | Gansu    | 34.4          | 104.0          | 2315         |
| 9   | Keriya     | Xinjiang | 36.9          | 81.7           | 1422         | 55  | Wudu       | Gansu    | 33.4          | 104.9          | 1079.1       |
| 10  | Gaotai     | Gansu    | 39.4          | 99.8           | 1332.2       | 56  | Dengqen    | Tibet    | 31.4          | 95.6           | 3873.1       |
| 11  | Zhangye    | Gansu    | 38.9          | 100.4          | 1482.7       | 57  | Nangqen    | Qinghai  | 32.2          | 96.5           | 3643.7       |
| 12  | Yongchang  | Gansu    | 38.2          | 102.0          | 1976.9       | 58  | Chamdo     | Tibet    | 31.1          | 97.2           | 3306         |
| 13  | Wuwei      | Gansu    | 37.9          | 102.7          | 1531.5       | 59  | Dege       | Sichuan  | 31.8          | 98.6           | 3184         |
| 14  | Wushaoling | Gansu    | 37.2          | 102.9          | 3045.1       | 60  | Garze      | Sichuan  | 31.6          | 100.0          | 3393.5       |
| 15  | Jingtai    | Gansu    | 37.2          | 104.1          | 1630.9       | 61  | Banma      | Qinghai  | 32.9          | 100.8          | 3530         |
| 16  | Dulan      | Qinghai  | 36.3          | 98.1           | 3191.1       | 62  | Sertar     | Sichuan  | 32.3          | 100.3          | 3893.9       |
| 17  | Qabqa      | Qinghai  | 36.3          | 100.6          | 2835         | 63  | Dawu       | Sichuan  | 31.0          | 101.1          | 2957.2       |
| 18  | Xining     | Qinghai  | 36.7          | 101.8          | 2295.2       | 64  | Ngawa      | Sichuan  | 32.9          | 101.7          | 3275.1       |
| 19  | Guizhou    | Qinghai  | 36.0          | 101.4          | 2237.1       | 65  | Barkam     | Sichuan  | 31.9          | 102.2          | 2664.4       |
| 20  | Minhe      | Qinghai  | 36.3          | 102.8          | 1813.9       | 66  | Hongyuan   | Sichuan  | 32.8          | 102.6          | 3491.6       |
| 21  | Wudaoliang | Qinghai  | 35.2          | 93.1           | 4612.2       | 67  | Xiaojin    | Sichuan  | 31.0          | 102.3          | 2369.2       |
| 22  | Xinghai    | Qinghai  | 35.6          | 100.0          | 3323.2       | 68  | Songpan    | Sichuan  | 32.6          | 103.6          | 2850.7       |
| 23  | Guinan     | Qinghai  | 35.6          | 100.8          | 3120         | 69  | Wenjiang   | Sichuan  | 30.7          | 103.8          | 539.3        |
| 24  | Tongde     | Qinghai  | 35.3          | 100.7          | 3289.4       | 70  | Dujiangyan | Sichuan  | 31.0          | 103.7          | 698.5        |
| 25  | Zekog      | Qinghai  | 35.0          | 101.5          | 3662.8       | 71  | Bome       | Tibet    | 29.9          | 95.8           | 2736         |
| 26  | Tongren    | Qinghai  | 35.5          | 102.0          | 2491.4       | 72  | Batang     | Sichuan  | 30.0          | 99.1           | 2589.2       |
| 27  | Yuzhong    | Gansu    | 35.9          | 104.2          | 1874.4       | 73  | Xinlong    | Sichuan  | 30.9          | 100.3          | 3000         |
| 28  | Linxia     | Gansu    | 35.6          | 103.2          | 1917.2       | 74  | Litang     | Sichuan  | 30.0          | 100.3          | 3948.9       |
| 29  | Lintao     | Gansu    | 35.4          | 103.8          | 1893.8       | 75  | Daocheng   | Sichuan  | 29.1          | 100.3          | 3727.7       |
| 30  | Shiquanhe  | Tibet    | 32.5          | 80.1           | 4278.6       | 76  | Kangding   | Sichuan  | 30.1          | 102.0          | 2615.7       |
| 31  | Gerze      | Tibet    | 32.1          | 84.4           | 4414.9       | 77  | Hanyuan    | Sichuan  | 29.4          | 102.7          | 795.9        |
| 32  | Nagqu      | Tibet    | 31.5          | 92.1           | 4507         | 78  | Zayu       | Tibet    | 28.6          | 97.5           | 2327.6       |
| 33  | Burang     | Tibet    | 30.3          | 81.3           | 4900         | 79  | Derong     | Sichuan  | 28.7          | 99.3           | 2422.9       |
| 34  | Damxung    | Tibet    | 30.5          | 91.1           | 4200         | 80  | Diqing     | Yunnan   | 28.5          | 98.9           | 3319         |
| 35  | Tsetang    | Tibet    | 29.3          | 91.8           | 3551.7       | 81  | Muli       | Sichuan  | 27.9          | 101.3          | 2426.5       |
| 36  | Nyalam     | Tibet    | 28.2          | 86.0           | 3810         | 82  | Jiulong    | Sichuan  | 29.0          | 101.5          | 2987.3       |
| 37  | Tingri     | Tibet    | 28.6          | 87.1           | 4300         | 83  | Yuexi      | Sichuan  | 28.6          | 102.5          | 1659.5       |
| 38  | Gyantse    | Tibet    | 28.9          | 89.6           | 4040         | 84  | Zhaojue    | Sichuan  | 28.0          | 102.8          | 2132.4       |
| 39  | Tuotuohe   | Qinghai  | 34.2          | 92.4           | 4533.1       | 85  | Gongshan   | Yunnan   | 27.8          | 98.7           | 1583.3       |
| 40  | Zhidoi     | Qinghai  | 33.9          | 95.6           | 4179         | 86  | Zhongdian  | Yunnan   | 27.8          | 99.7           | 3276.7       |
| 41  | Zadoi      | Qinghai  | 32.9          | 95.3           | 4066.4       | 87  | Weixi      | Yunnan   | 27.2          | 99.3           | 2326.1       |
| 42  | Qumarleb   | Qinghai  | 34.1          | 95.8           | 4175         | 88  | Yanyuan    | Sichuan  | 27.4          | 101.5          | 2545         |
| 43  | Yushu      | Qinghai  | 33.0          | 97.0           | 3681.2       | 89  | Xichang    | Sichuan  | 27.9          | 102.3          | 1590.9       |
| 44  | Madoi      | Qinghai  | 34.9          | 98.2           | 4272.3       | 90  | Lijiang    | Yunnan   | 26.9          | 100.2          | 2392.4       |
| 45  | Qingshuihe | Qinghai  | 33.8          | 97.1           | 4415.4       | 91  | Huaping    | Yunnan   | 26.6          | 101.3          | 1244.8       |
| 46  | Shiqu      | Sichuan  | 33.0          | 98.1           | 4200         |     |            |          |               |                |              |

**Table S2.** Statistical results of  $Z$ ,  $SLOPE$ , and  $R_{st}$  associated with the rainfall erosivity trend classification at each meteorological station on the TP from 1971 to 2020.

| No. | Station    | $Z$             | $SLOPE$ | $R_{st}$ | No. | Station    | $Z$             | $SLOPE$ | $R_{st}$ |
|-----|------------|-----------------|---------|----------|-----|------------|-----------------|---------|----------|
| 1   | Artux      | -1.08           | -0.87   | 0.20     | 47  | Golog      | 0.20            | 0.50    | 0.96     |
| 2   | Wuqia      | 1.25            | 1.81    | 0.64     | 48  | Darlag     | 1.52            | 2.11    | 0.66     |
| 3   | Kashgar    | 1.00            | 0.73    | 0.95     | 49  | Henan      | -0.84           | -3.46   | 0.65     |
| 4   | Makit      | 0.45            | 0.23    | 0.07     | 50  | Jigzhi     | 0.20            | 0.41    | 0.83     |
| 5   | Yarkant    | -0.24           | -0.42   | 0.23     | 51  | Maqu       | 1.54            | 5.65    | 0.80     |
| 6   | Pishan     | 1.05            | 1.40    | 1.00     | 52  | Zoige      | 0.84            | 4.74    | 1.00     |
| 7   | Hotan      | -0.23           | -0.99   | 1.00     | 53  | Hezuo      | 0.65            | 1.92    | 0.81     |
| 8   | Minfeng    | 0.06            | 0.21    | 0.19     | 54  | Min        | <b>2.12 **</b>  | 8.78    | 1.00     |
| 9   | Keriya     | 0.29            | 0.28    | 0.43     | 55  | Wudu       | 0.70            | 3.65    | 1.00     |
| 10  | Gaotai     | 0.44            | 0.19    | 0.28     | 56  | Dengqen    | 0.72            | 2.17    | 0.89     |
| 11  | Zhangye    | 0.20            | 0.27    | 0.32     | 57  | Nangqen    | -0.12           | -0.33   | 0.63     |
| 12  | Yongchang  | 1.82 *          | 2.10    | 0.89     | 58  | Chamdo     | 1.44            | 3.33    | 0.68     |
| 13  | Wuwei      | <b>2.66 ***</b> | 3.47    | 0.97     | 59  | Dege       | 1.04            | 3.21    | 1.00     |
| 14  | Wushaoling | 1.44            | 3.09    | 0.83     | 60  | Garze      | 0.13            | 0.50    | 0.99     |
| 15  | Jingtai    | 1.49            | 2.65    | 0.71     | 61  | Banma      | -0.52           | -0.86   | 0.61     |
| 16  | Dulan      | <b>3.20 ***</b> | 2.62    | 0.64     | 62  | Sertar     | 1.64            | 3.51    | 0.96     |
| 17  | Qabqa      | 1.19            | 1.36    | 0.83     | 63  | Dawu       | 1.17            | 3.58    | 1.00     |
| 18  | Xining     | 1.29            | 3.01    | 0.99     | 64  | Ngawa      | 0.67            | 1.85    | 1.00     |
| 19  | Guizhou    | -0.84           | -1.15   | 0.53     | 65  | Barkam     | 0.95            | 4.87    | 1.00     |
| 20  | Minhe      | 1.39            | 3.30    | 0.90     | 66  | Hongyuan   | 1.04            | 4.18    | 1.00     |
| 21  | Wudaoliang | <b>1.65 *</b>   | 1.71    | 0.71     | 67  | Xiaojin    | 1.22            | 2.63    | 0.83     |
| 22  | Xinghai    | <b>1.76 *</b>   | 3.23    | 0.82     | 68  | Songpan    | 1.52            | 4.46    | 1.00     |
| 23  | Guinan     | <b>2.31 **</b>  | 6.78    | 0.83     | 69  | Wenjiang   | 0.47            | 6.70    | 1.00     |
| 24  | Tongde     | 1.37            | 3.03    | 0.62     | 70  | Dujiangyan | 0.07            | 0.70    | 0.93     |
| 25  | Zekog      | <b>2.93 ***</b> | 6.52    | 0.72     | 71  | Bome       | -0.02           | -0.18   | 0.42     |
| 26  | Tongren    | 0.67            | 1.88    | 0.94     | 72  | Batang     | 1.37            | 3.88    | 0.46     |
| 27  | Yuzhong    | 0.37            | 1.35    | 0.99     | 73  | Xinlong    | 1.59            | 5.35    | 1.00     |
| 28  | Linxia     | 1.52            | 6.35    | 1.00     | 74  | Litang     | <b>1.69 *</b>   | 5.72    | 0.50     |
| 29  | Lintao     | -0.62           | -2.85   | 0.57     | 75  | Daocheng   | 1.66 *          | 6.10    | 0.60     |
| 30  | Shiquanhe  | -0.25           | -0.24   | 0.21     | 76  | Kangding   | <b>3.01 ***</b> | 11.29   | 0.82     |
| 31  | Gerze      | <b>2.92 ***</b> | 3.15    | 0.65     | 77  | Hanyuan    | 1.54            | 7.99    | 0.67     |
| 32  | Nagqu      | 1.44            | 2.86    | 1.00     | 78  | Zayu       | -0.60           | -4.20   | 0.39     |
| 33  | Burang     | -0.40           | -0.46   | 0.09     | 79  | Derong     | <b>2.68 ***</b> | 6.64    | 1.00     |
| 34  | Damxung    | 0.33            | 0.65    | 0.72     | 80  | Diqing     | 0.30            | 1.60    | 0.48     |
| 35  | Tsetang    | 1.20            | 3.04    | 0.95     | 81  | Muli       | 1.57            | 8.96    | 0.76     |
| 36  | Nyalam     | -0.57           | -5.85   | 0.37     | 82  | Jiulong    | 1.22            | 4.54    | 0.80     |
| 37  | Tingri     | -0.18           | -0.20   | 0.44     | 83  | Yuexi      | 0.77            | 8.66    | 0.98     |
| 38  | Gyantse    | 0.45            | 0.70    | 0.64     | 84  | Zhaojue    | 1.04            | 8.12    | 0.69     |
| 39  | Tuotuohe   | 0.02            | 0.04    | 0.28     | 85  | Gongshan   | -1.39           | -28.20  | 0.60     |
| 40  | Zhidoi     | 0.73            | 0.93    | 0.89     | 86  | Zhongdian  | 0.22            | 0.53    | 0.79     |
| 41  | Zadoi      | 0.33            | 0.63    | 0.58     | 87  | Weixi      | -1.39           | -9.72   | 0.55     |
| 42  | Qumarleb   | 1.41            | 1.72    | 0.84     | 88  | Yanyuan    | -0.02           | -0.10   | 0.90     |
| 43  | Yushu      | -0.30           | -0.39   | 0.78     | 89  | Xichang    | 1.62            | 23.59   | 0.75     |
| 44  | Madoi      | 0.30            | 0.27    | 0.46     | 90  | Lijiang    | 0.72            | 8.20    | 0.76     |
| 45  | Qingshuihe | -0.32           | -0.65   | 0.55     | 91  | Huaping    | 1.17            | 21.61   | 0.89     |
| 46  | Shiqu      | 0.22            | 0.35    | 0.58     |     |            |                 |         |          |

Bold numbers indicate a significant trend and the asterisks designate the confidence interval \* 90%, \*\* 95%, \*\*\* 99%. Note: The  $Z$  indicates the MK trend detection value, the  $SLOPE$  is the

Sen's slope value of rainfall erosivity changes, and the  $R_{ST}$  refers to the ratio of the rainfall erosivity in the past 3 years to the maximum 3-year moving average.

**Table S3.** The average heavy rainfall (AHR) and its proportion (HR) and the proportion of average heavy rain erosivity (HRE) of each station from 1971 to 2020.

| No. | Station    | HR (mm) | HRE<br>(MJ·mm·ha <sup>-1</sup> ·h <sup>-1</sup> ) | No. | Station    | HR (mm) | HRE<br>(MJ·mm·ha <sup>-1</sup> ·h <sup>-1</sup> ) |
|-----|------------|---------|---------------------------------------------------|-----|------------|---------|---------------------------------------------------|
| 1   | Artux      | 31.43   | 185.45                                            | 47  | Golog      | 29.32   | 129.34                                            |
| 2   | Wuqia      | 31.77   | 152.32                                            | 48  | Darlag     | 28.92   | 125.4                                             |
| 3   | Kashgar    | 31.13   | 239.11                                            | 49  | Henan      | 32.7    | 171.19                                            |
| 4   | Makit      | 33.84   | 449.9                                             | 50  | Jigzhi     | 30.56   | 143.34                                            |
| 5   | Yarkant    | 33.82   | 344.29                                            | 51  | Maqu       | 34.68   | 192.09                                            |
| 6   | Pishan     | 33.56   | 692.46                                            | 52  | Zoige      | 32.43   | 168.95                                            |
| 7   | Hotan      | 27.7    | 3722.51                                           | 53  | Hezuo      | 33.07   | 176.35                                            |
| 8   | Minfeng    | 32.94   | 795.06                                            | 54  | Min        | 33.56   | 180.93                                            |
| 9   | Keriya     | 35.14   | 318.75                                            | 55  | Wudu       | 35.44   | 205.62                                            |
| 10  | Gaotai     | 33.76   | 330.86                                            | 56  | Dengqen    | 30.12   | 139.41                                            |
| 11  | Zhangye    | 29.4    | 162.58                                            | 57  | Nangqen    | 30.32   | 138.12                                            |
| 12  | Yongchang  | 32.08   | 173.37                                            | 58  | Chamdo     | 31.54   | 152.9                                             |
| 13  | Wuwei      | 37.12   | 246.99                                            | 59  | Dege       | 29.45   | 131.26                                            |
| 14  | Wushaoling | 30.19   | 138.5                                             | 60  | Garze      | 28.75   | 124.38                                            |
| 15  | Jingtai    | 34.83   | 197.66                                            | 61  | Banma      | 30.72   | 142.41                                            |
| 16  | Dulan      | 29.54   | 134.58                                            | 62  | Sertar     | 30.09   | 140                                               |
| 17  | Qabqa      | 31.9    | 156.23                                            | 63  | Dawu       | 30.92   | 146.62                                            |
| 18  | Xining     | 33.05   | 170.02                                            | 64  | Ngawa      | 31.01   | 148.56                                            |
| 19  | Guizhou    | 31.25   | 154.48                                            | 65  | Barkam     | 30.85   | 150.5                                             |
| 20  | Minhe      | 34.37   | 190.82                                            | 66  | Hongyuan   | 31.56   | 156.08                                            |
| 21  | Wudaoliang | 29.91   | 136.52                                            | 67  | Xiaojin    | 29.21   | 129.23                                            |
| 22  | Xinghai    | 31.7    | 153.38                                            | 68  | Songpan    | 30.44   | 142                                               |
| 23  | Guinan     | 31.44   | 153                                               | 69  | Wenjiang   | 51.23   | 500.45                                            |
| 24  | Tongde     | 31.36   | 153.6                                             | 70  | Dujiangyan | 51.45   | 512.46                                            |
| 25  | Zekog      | 31.94   | 156.91                                            | 71  | Bome       | 34.22   | 197.21                                            |
| 26  | Tongren    | 32.03   | 163.28                                            | 72  | Batang     | 30.45   | 141.98                                            |
| 27  | Yuzhong    | 35.66   | 210.26                                            | 73  | Xinlong    | 30.86   | 154.56                                            |
| 28  | Linxia     | 34.99   | 203                                               | 74  | Litang     | 32.24   | 163.7                                             |
| 29  | Lintao     | 34.94   | 207.82                                            | 75  | Daocheng   | 31.24   | 154.04                                            |
| 30  | Shiquanhe  | 28.57   | 257.95                                            | 76  | Kangding   | 30.78   | 149.39                                            |
| 31  | Gerze      | 31.84   | 166.11                                            | 77  | Hanyuan    | 38.84   | 267.52                                            |
| 32  | Nagqu      | 29.79   | 134.31                                            | 78  | Zayu       | 37.09   | 233.94                                            |
| 33  | Burang     | 38.66   | 276.68                                            | 79  | Derong     | 31.01   | 146.88                                            |
| 34  | Damxung    | 31.33   | 149.03                                            | 80  | Diqing     | 32.64   | 170.43                                            |
| 35  | Tsetang    | 29.76   | 133.85                                            | 81  | Muli       | 34.18   | 108.73                                            |
| 36  | Nyalam     | 45.79   | 375.94                                            | 82  | Jiulong    | 30.45   | 149.47                                            |
| 37  | Tingri     | 31.83   | 156.31                                            | 83  | Yuexi      | 37.03   | 245.11                                            |
| 38  | Gyantse    | 29.68   | 134.18                                            | 84  | Zhaojue    | 36.34   | 231.52                                            |
| 39  | Tuotuohe   | 34.91   | 213.06                                            | 85  | Gongshan   | 37.99   | 258.23                                            |
| 40  | Zhidoi     | 27.96   | 116.06                                            | 86  | Zhongdian  | 32.76   | 171.3                                             |
| 41  | Zadoi      | 29      | 124.27                                            | 87  | Weixi      | 34.66   | 206.75                                            |
| 42  | Qumarleb   | 30.71   | 142.08                                            | 88  | Yanyuan    | 36.06   | 222.45                                            |
| 43  | Yushu      | 29.63   | 131.44                                            | 89  | Xichang    | 41.16   | 311.65                                            |
| 44  | Madoi      | 31.72   | 165.94                                            | 90  | Lijiang    | 37.53   | 245.24                                            |

|    |            |       |        |    |            |       |        |
|----|------------|-------|--------|----|------------|-------|--------|
| 45 | Qingshuihe | 31.6  | 156.27 | 91 | Huaping    | 44.82 | 386.77 |
| 46 | Shiqu      | 31.29 | 153.53 |    | Study area | 33.05 | 243.35 |

---
